# Supplementary material for: The Steric Effect in Preparations of Vanadium(II)/(III) Dinitrogen Complexes of Triamidoamine Ligands Bearing Bulky Substituents
Source: MDPI journal article supplement (doi:10.3390/molecules27185864), 2022-09-09
Supplement: s1 [file s1]

## Supplementary Materials

### **The Steric Effect in Preparations of Vanadium(II)/(III) Dinitrogen Complexes of Triamidoamine Ligands Bearing Bulky Substituents**

## Contents:

|                    |                                                                                                                                                                                                                                  |     |
|--------------------|----------------------------------------------------------------------------------------------------------------------------------------------------------------------------------------------------------------------------------|-----|
| <b>Table S1.</b>   | Experimental Data for X-ray Diffraction Studies on Crystalline Complexes <b>1</b> , <b>2</b> , <b>3</b> , and <b>4</b>                                                                                                           | S3  |
| <b>Figure S1.</b>  | Raman spectra of <b>1</b> prepared under $^{14}\text{N}_2$ and $^{15}\text{N}_2$ in toluene ( $\lambda_{\text{ex}} = 532 \text{ nm}$ ) at room temperature and their difference spectrum.                                        | S4  |
| <b>Figure S2.</b>  | Raman spectra of <b>2</b> prepared under $^{14}\text{N}_2$ and $^{15}\text{N}_2$ in toluene ( $\lambda_{\text{ex}} = 532 \text{ nm}$ ) at room temperature and their difference spectrum.                                        | S5  |
| <b>Figure S3.</b>  | IR spectra (ATR) of <b>1</b> prepared under $^{14}\text{N}_2$ and $^{15}\text{N}_2$ .                                                                                                                                            | S6  |
| <b>Figure S4.</b>  | IR spectra (ATR) of <b>2</b> prepared under $^{14}\text{N}_2$ and $^{15}\text{N}_2$ .                                                                                                                                            | S6  |
| <b>Figure S5.</b>  | IR spectra (ATR) of <b>4</b> prepared under $^{14}\text{N}_2$ (black line) and $^{15}\text{N}_2$ (red line).                                                                                                                     | S7  |
| <b>Figure S6.</b>  | $^1\text{H}$ NMR spectrum of $[\{\text{V}(\text{L}^{\text{iPr}})\}_2(\mu\text{-N}_2)]$ ( <b>1</b> ) in $\text{C}_6\text{D}_6$ at 298 K.                                                                                          | S8  |
| <b>Figure S7.</b>  | $^1\text{H}$ NMR spectrum of $[\{\text{V}(\text{L}^{\text{Pen}})\}_2(\mu\text{-N}_2)]$ ( <b>2</b> ) in $\text{C}_6\text{D}_6$ at 298 K.                                                                                          | S8  |
| <b>Figure S8.</b>  | $^{15}\text{N}$ NMR spectrum of $[\{\text{V}(\text{L}^{\text{iPr}})\}_2(\mu\text{-}^{15}\text{N}_2)]$ ( <b>1'</b> ) in $\text{C}_6\text{D}_6$ at 298 K.                                                                          | S9  |
| <b>Figure S9.</b>  | $^{15}\text{N}$ NMR spectrum of $[\{\text{V}(\text{L}^{\text{Pen}})\}_2(\mu\text{-}^{15}\text{N}_2)]$ ( <b>2'</b> ) in $\text{C}_6\text{D}_6$ at 298 K.                                                                          | S9  |
| <b>Figure S10.</b> | $^{51}\text{V}$ NMR spectrum of $[\{\text{V}(\text{L}^{\text{iPr}})\}_2(\mu\text{-N}_2)]$ ( <b>1</b> ) in $\text{C}_6\text{D}_6$ at 298 K.                                                                                       | S10 |
| <b>Figure S11.</b> | $^{51}\text{V}$ NMR spectrum of $[\{\text{V}(\text{L}^{\text{Pen}})\}_2(\mu\text{-N}_2)]$ ( <b>2</b> ) in $\text{C}_6\text{D}_6$ at 298 K.                                                                                       | S10 |
| <b>Figure S12.</b> | $^1\text{H}$ NMR spectrum of $[\text{V}(\text{L}^{\text{Cy2}})]$ ( <b>3</b> ) in $\text{C}_6\text{D}_6$ at 298 K.                                                                                                                | S11 |
| <b>Figure S13.</b> | $^1\text{H}$ NMR spectrum of $[\text{VK}(\text{L}^{\text{Cy2}})(\mu\text{-N}_2)(18\text{-crown-6})]$ ( <b>4</b> ) in $\text{C}_6\text{D}_6$ at 298 K.                                                                            | S12 |
| <b>Figure S14.</b> | $^1\text{H}$ NMR spectra of $\text{H}_3\text{L}^{\text{Cy2}}$ and $[\text{VK}(\text{L}^{\text{Cy2}})(\mu\text{-N}_2)(18\text{-crown-6})]$ ( <b>4</b> ) in the range of $-2 - 10 \text{ ppm}$ in $\text{C}_6\text{D}_6$ at 298 K. | S12 |
| <b>Figure S15.</b> | $^1\text{H}$ NMR spectrum of $^{14}\text{NH}_4^+$ that was obtained from the reaction of <b>1</b> with 80 equiv. $\text{K}[\text{C}_{10}\text{H}_8]$ and 80 equiv. HOTf under $^{14}\text{N}_2$ .                                | S13 |
| <b>Table S2.</b>   | Yields of $\text{NH}_3$ and $\text{N}_2\text{H}_4$ Produced by the Protonation of Dinitrogen Ligands for <b>1</b> , <b>2</b> , <b>3</b> , and <b>4</b> .                                                                         | S14 |
| <b>Figure S16.</b> | Calibration curves for hydrazine quantification.                                                                                                                                                                                 | S15 |

**Table S1.** Experimental Data for X-ray Diffraction Studies on Crystalline Complexes **1**, **2**, **3**, and **4**

| compound                                                    | <b>1</b>                                                       | <b>2</b>                                                       | <b>3</b>                                         | <b>4</b>                                                          |
|-------------------------------------------------------------|----------------------------------------------------------------|----------------------------------------------------------------|--------------------------------------------------|-------------------------------------------------------------------|
| formula                                                     | C <sub>30</sub> H <sub>66</sub> N <sub>10</sub> V <sub>2</sub> | C <sub>42</sub> H <sub>90</sub> N <sub>10</sub> V <sub>2</sub> | C <sub>45</sub> H <sub>81</sub> N <sub>4</sub> V | C <sub>68</sub> H <sub>128</sub> KN <sub>6</sub> O <sub>8</sub> V |
| formula weight                                              | 668.80                                                         | 845.86                                                         | 729.07                                           | 1219.87                                                           |
| crystal system                                              | Orthorhombic                                                   | Monoclinic                                                     | Monoclinic                                       | Monoclinic                                                        |
| space group                                                 | <i>Cmca</i>                                                    | <i>C2/c</i>                                                    | <i>P2<sub>1</sub>/c</i>                          | <i>P2<sub>1</sub>/c</i>                                           |
| <i>a</i> [Å]                                                | 15.9064(4)                                                     | 16.8740(6)                                                     | 10.8057(2)                                       | 13.9446(3)                                                        |
| <i>b</i> [Å]                                                | 12.2273(4)                                                     | 19.0029(7)                                                     | 20.5056(4)                                       | 22.9058(4)                                                        |
| <i>c</i> [Å]                                                | 19.1253(5)                                                     | 14.4824(5)                                                     | 19.1296(4)                                       | 22.4762(4)                                                        |
| $\alpha$ [°]                                                | 90                                                             | 90                                                             | 90                                               | 90                                                                |
| $\beta$ [°]                                                 | 90                                                             | 91.324(6)                                                      | 97.359(7)                                        | 99.918(7)                                                         |
| $\gamma$ [°]                                                | 90                                                             | 90                                                             | 90                                               | 90                                                                |
| <i>V</i> [Å <sup>3</sup> ]                                  | 3719.72(18)                                                    | 4642.6(3)                                                      | 4203.77(16)                                      | 7071.9(3)                                                         |
| <i>Z</i>                                                    | 4                                                              | 4                                                              | 4                                                | 4                                                                 |
| temp [K]                                                    | 173                                                            | 173                                                            | 173                                              | 173                                                               |
| $\lambda$ [Å]                                               | 0.71073                                                        | 0.71073                                                        | 0.71073                                          | 1.54178                                                           |
| $\rho_{\text{calc}}$ [g cm <sup>-3</sup> ]                  | 1.194                                                          | 1.210                                                          | 1.152                                            | 1.172                                                             |
| $\mu$ [mm <sup>-1</sup> ]                                   | 0.536                                                          | 0.444                                                          | 0.271                                            | 2.215                                                             |
| No. of reflections                                          | 17179                                                          | 22176                                                          | 39808                                            | 12841                                                             |
| No. of independent reflections [R(int)]                     | 2191<br>(0.051)                                                | 5308<br>(0.071)                                                | 9593<br>(0.042)                                  | 12841<br>(0.047)                                                  |
| No. of parameters                                           | 121                                                            | 250                                                            | 451                                              | 846                                                               |
| <i>R</i> <sub>1</sub> ( <i>I</i> > 2 $\sigma$ ( <i>I</i> )) | 0.0408                                                         | 0.0442                                                         | 0.0435                                           | 0.0616                                                            |
| <i>wR</i> <sub>2</sub> (all data)                           | 0.0878                                                         | 0.0972                                                         | 0.043                                            | 0.1651                                                            |
| goodness-of-fit on <i>F</i> <sup>2</sup>                    | 1.083                                                          | 1.030                                                          | 1.035                                            | 1.031                                                             |
| largest diff. peak/hole [eÅ <sup>-3</sup> ]                 | 0.38 / -0.22                                                   | 0.54 / -0.22                                                   | 0.32 / -0.38                                     | 0.565 / -0.561                                                    |

[a]  $R_1 = \sum ||F_o| - |F_c|| / \sum |F_o|$  for  $F_o > 2\sigma(F_o)$ . [b]  $wR_2 = [\sum w(F_o^2 - F_c^2)^2 / \sum w(F_o^2)^2]^{1/2}$ .

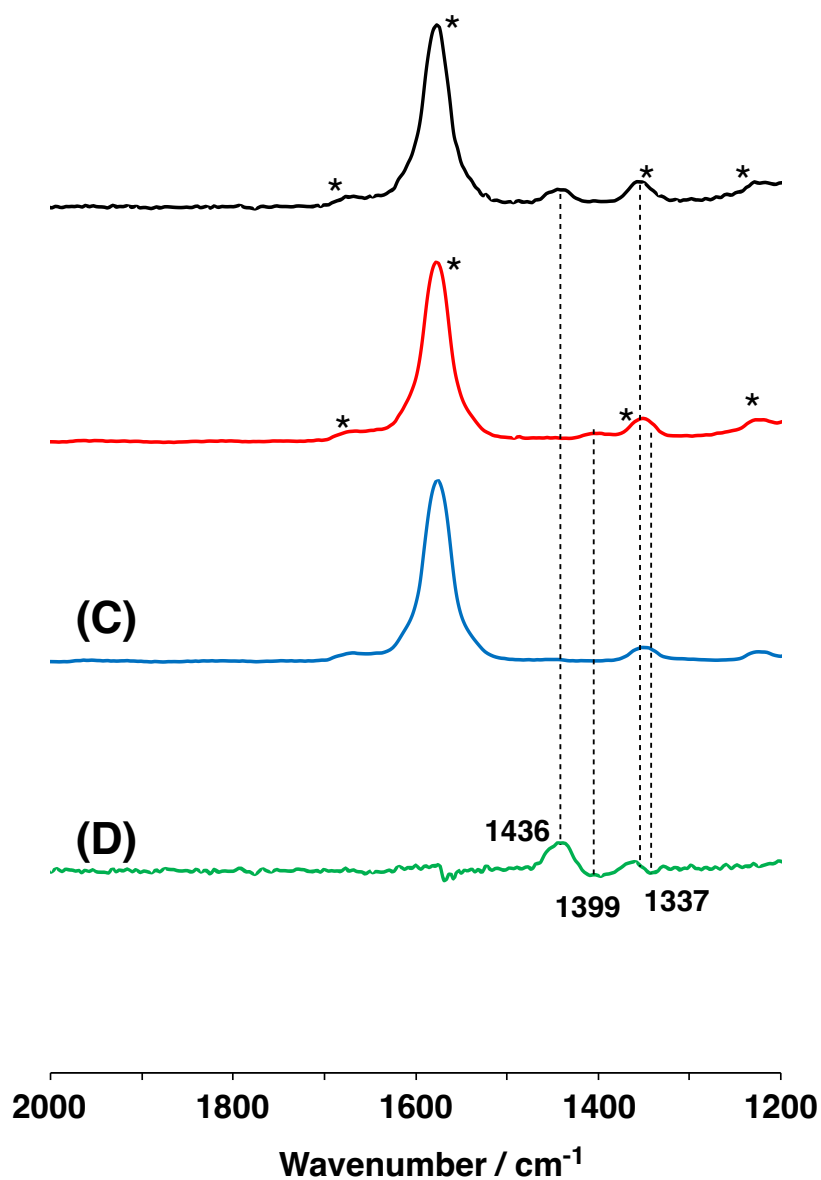

**Figure S1.** Raman spectra of **1** prepared under <sup>14</sup>N<sub>2</sub> (spectrum A) and <sup>15</sup>N<sub>2</sub> (spectrum B) in toluene as solvent (spectrum C) ( $\lambda_{\text{ex}} = 532$  nm) at room temperature and their difference spectrum (spectrum D). Peaks with asterisks indicate those of toluene as a solvent.

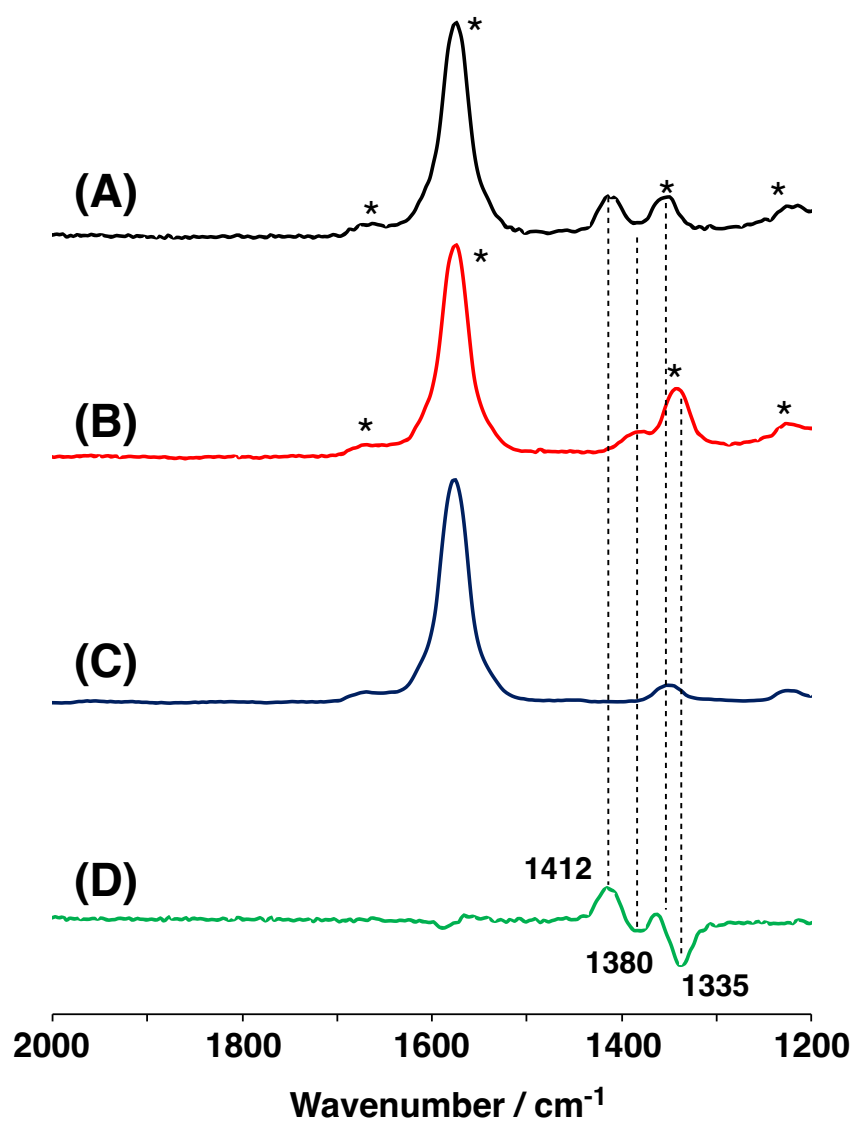

**Figure S2.** Raman spectra of **2** prepared under <sup>14</sup>N<sub>2</sub> (spectrum A) and <sup>15</sup>N<sub>2</sub> (spectrum B) in toluene as solvent (spectrum C) ( $\lambda_{\text{ex}} = 532$  nm) at room temperature and their difference spectrum (spectrum D). Peaks with asterisks indicate those of toluene as a solvent.

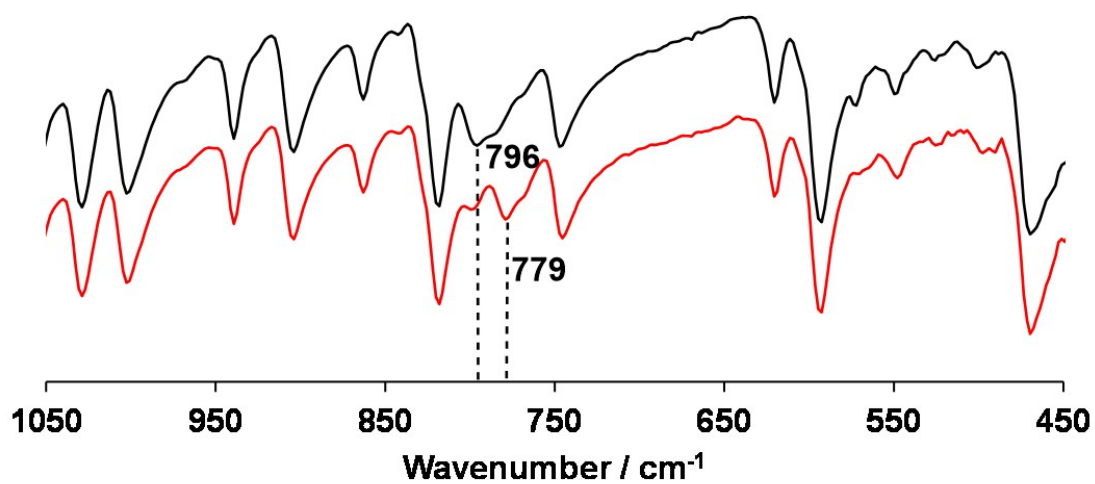

**Figure S3.** IR spectra (ATR) of 1 prepared under <sup>14</sup>N<sub>2</sub> (black line) and <sup>15</sup>N<sub>2</sub> (red line).

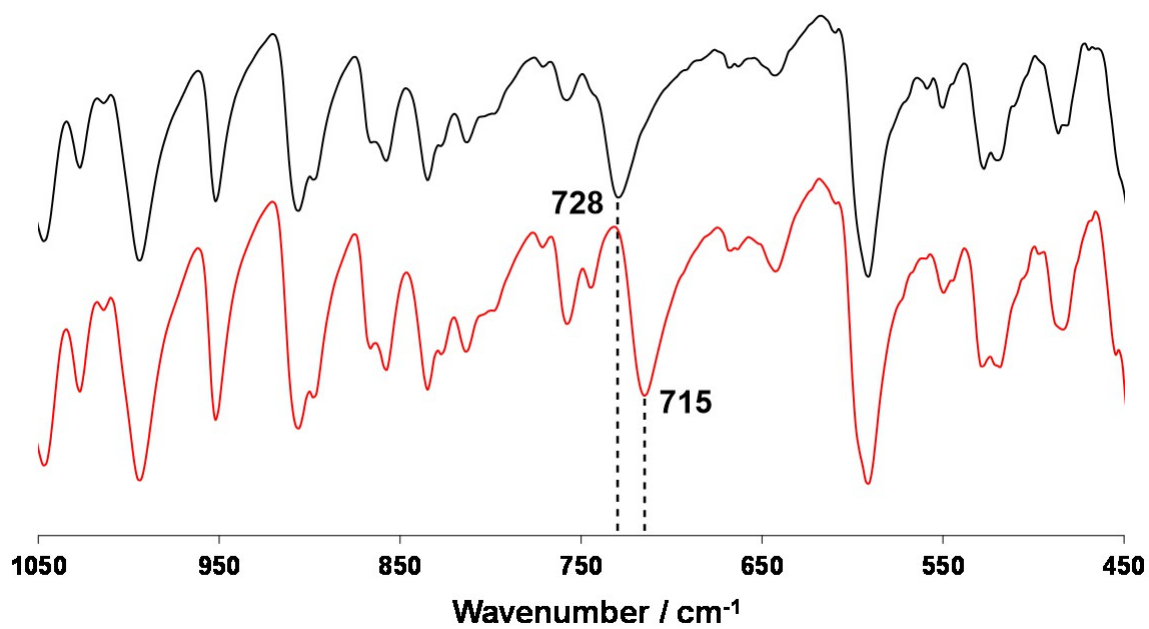

**Figure S4.** IR spectra (ATR) of 2 prepared under <sup>14</sup>N<sub>2</sub> (black line) and <sup>15</sup>N<sub>2</sub> (red line).

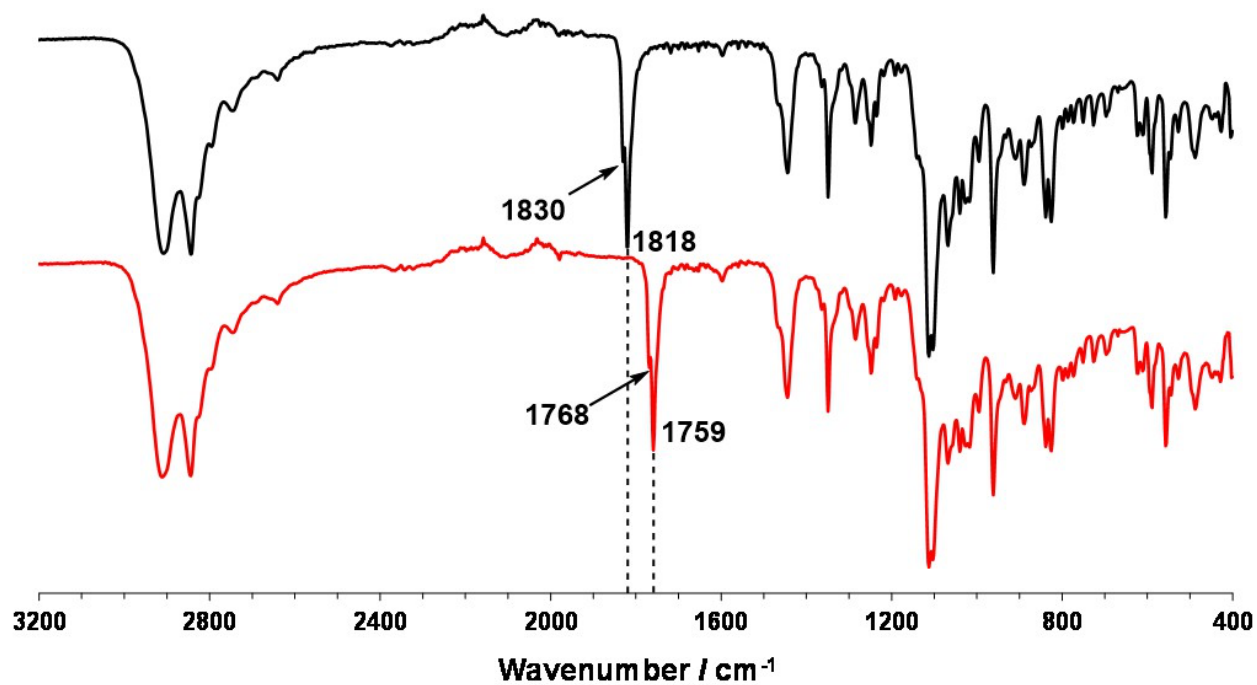

**Figure S5.** IR spectra (ATR) of **4** prepared under <sup>14</sup>N<sub>2</sub> (black line) and <sup>15</sup>N<sub>2</sub> (red line).

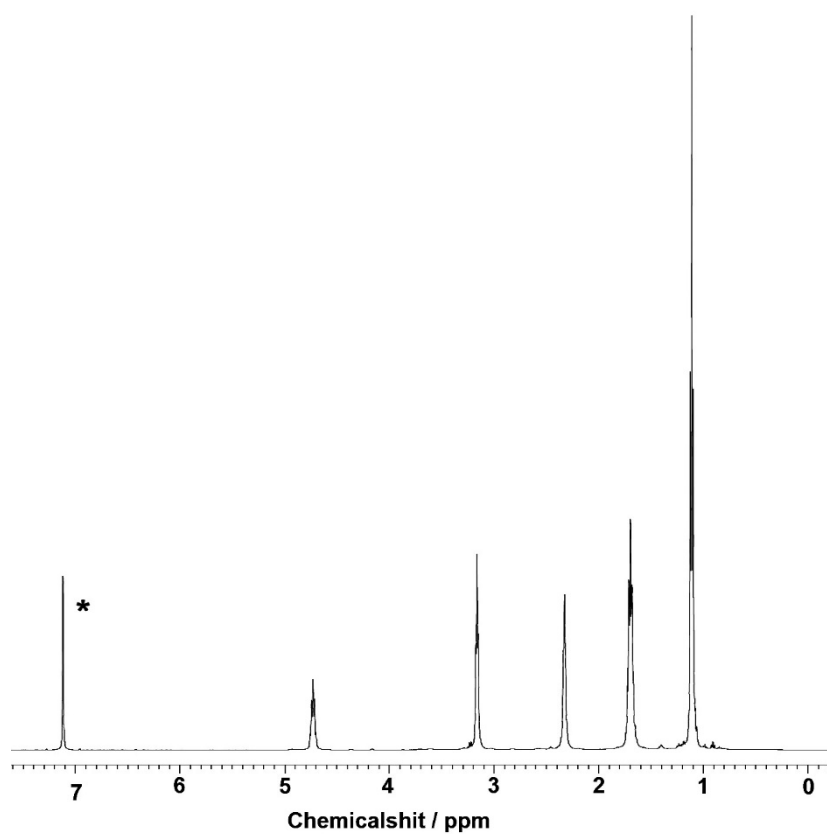

**Figure S6.**  $^1\text{H}$  NMR spectrum of  $[\{\text{V}(\text{L}^{\text{IPr}})\}_2(\mu\text{-N}_2)]$  (**1**) in  $\text{C}_6\text{D}_6$  at 298 K (500 MHz,  $\delta/\text{ppm}$  vs  $\text{C}_6\text{D}_6$  (7.16 ppm)). The peak with an asterisk shows solvent.

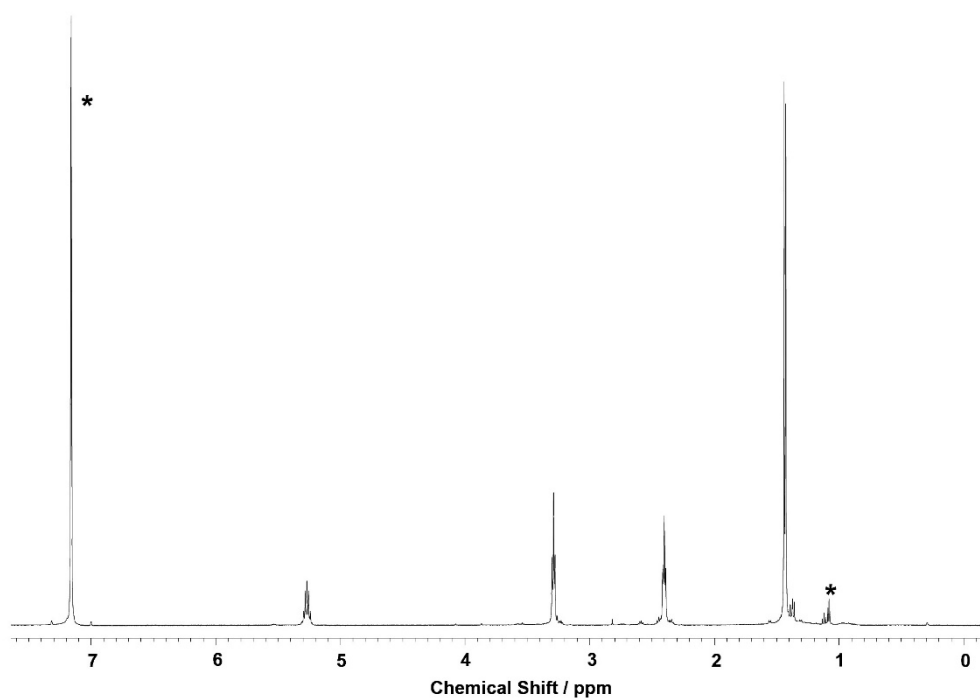

**Figure S7.**  $^1\text{H}$  NMR spectrum of  $[\{\text{V}(\text{L}^{\text{Pen}})\}_2(\mu\text{-N}_2)]$  (**2**) in  $\text{C}_6\text{D}_6$  at 298 K (500 MHz,  $\delta/\text{ppm}$  vs  $\text{C}_6\text{D}_6$  (7.16 ppm)). The peaks with an asterisk show those of solvent and small amounts of impurities.



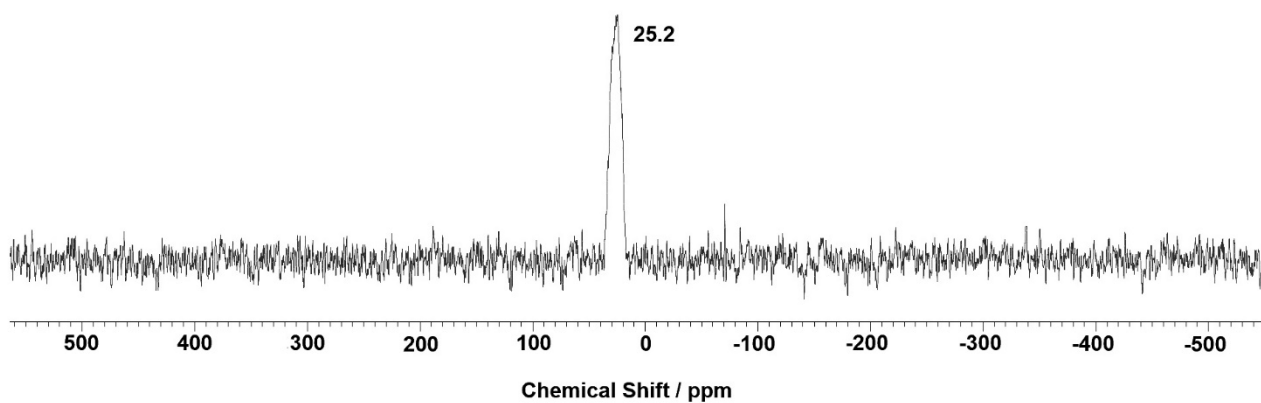

**Figure S8.**  $^{15}\text{N}$  NMR spectrum of  $[\{\text{VL}^{\text{iPr}}\}_2(\mu\text{-}^{15}\text{N}_2)]$  (**1'**) in  $\text{C}_6\text{D}_6$  at 298 K (60.815 MHz,  $\delta/\text{ppm}$  vs  $\text{CH}_3\text{NO}_2$  (0.00 ppm)).

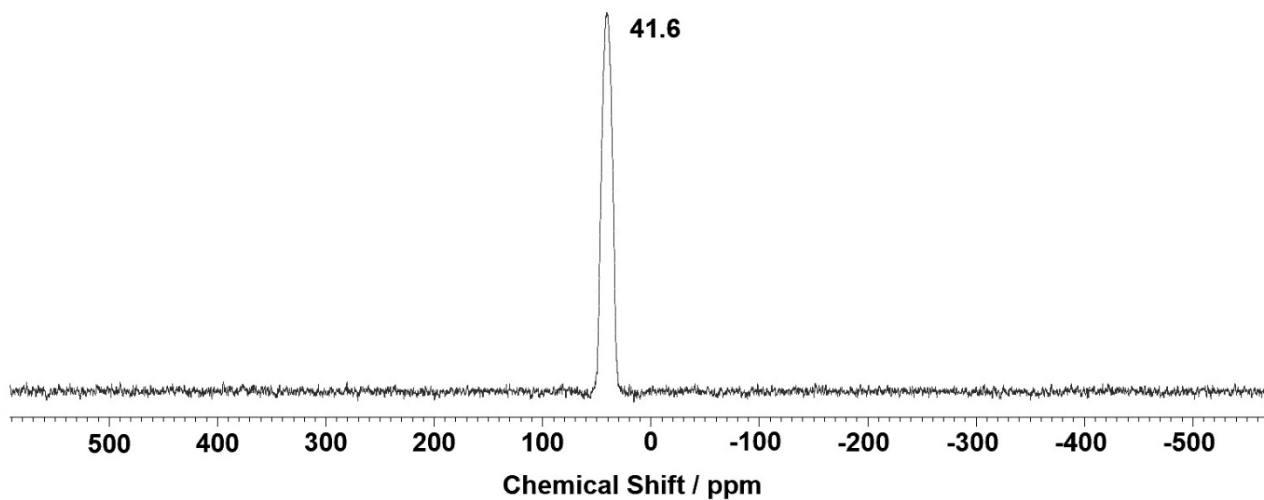

**Figure S9.**  $^{15}\text{N}$  NMR spectrum of  $[\{\text{VL}^{\text{pen}}\}_2(\mu\text{-}^{15}\text{N}_2)]$  (**2'**) in  $\text{C}_6\text{D}_6$  at 298 K (60.815 MHz,  $\delta/\text{ppm}$  vs  $\text{CH}_3\text{NO}_2$  (0.00 ppm)).

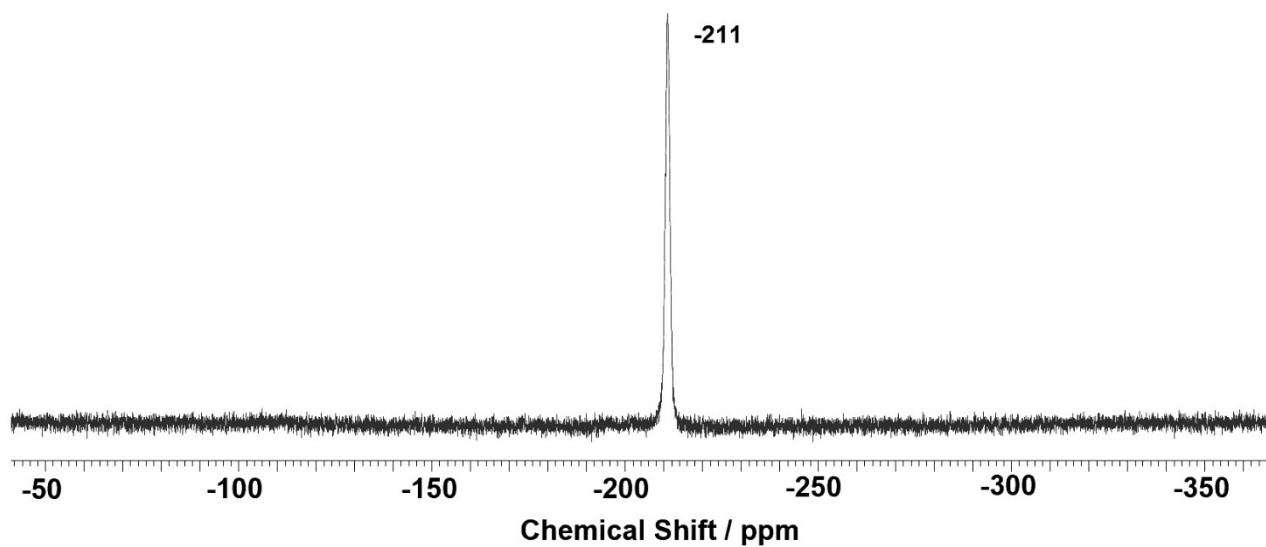

**Figure S10.**  $^{51}\text{V}$  NMR spectrum of  $[\{\text{V}(\text{L}^{\text{IPr}})\}_2(\mu\text{-N}_2)]$  (**1**) in  $\text{C}_6\text{D}_6$  at 298 K (131.56 MHz,  $\delta/\text{ppm}$  vs  $\text{VOCl}_3$  (0.00 ppm)).

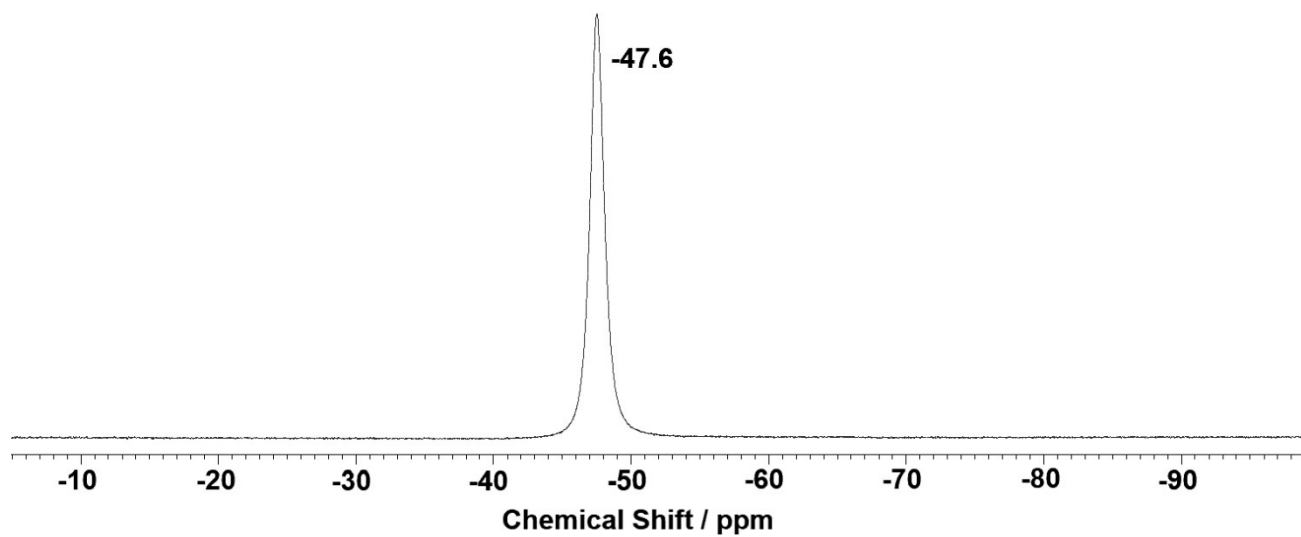

**Figure S11.**  $^{51}\text{V}$  NMR spectrum of  $[\{\text{V}(\text{L}^{\text{Pen}})\}_2(\mu\text{-N}_2)]$  (**2**) in  $\text{C}_6\text{D}_6$  at 298 K (131.56 MHz,  $\delta/\text{ppm}$  vs  $\text{VOCl}_3$  (0.00 ppm)).

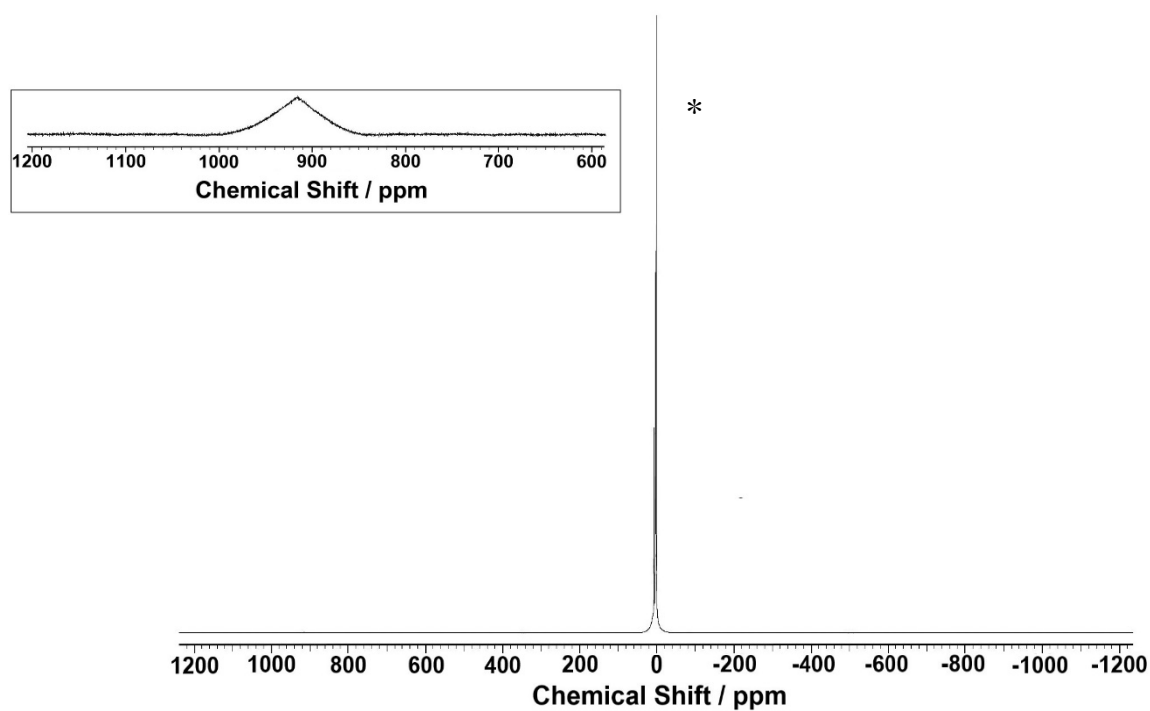

**Figure S12.**  $^1\text{H}$  NMR spectrum of  $[\text{V}(\text{L}^{\text{Cy}2})]$  (**3**) in  $\text{C}_6\text{D}_6$  at 298 K (500 MHz,  $\delta/\text{ppm}$  vs  $\text{C}_6\text{D}_6$  (7.16 ppm)). The peak with an asterisk shows solvent. Inset: Expanded views of a range of 1200 – 600 ppm (top).

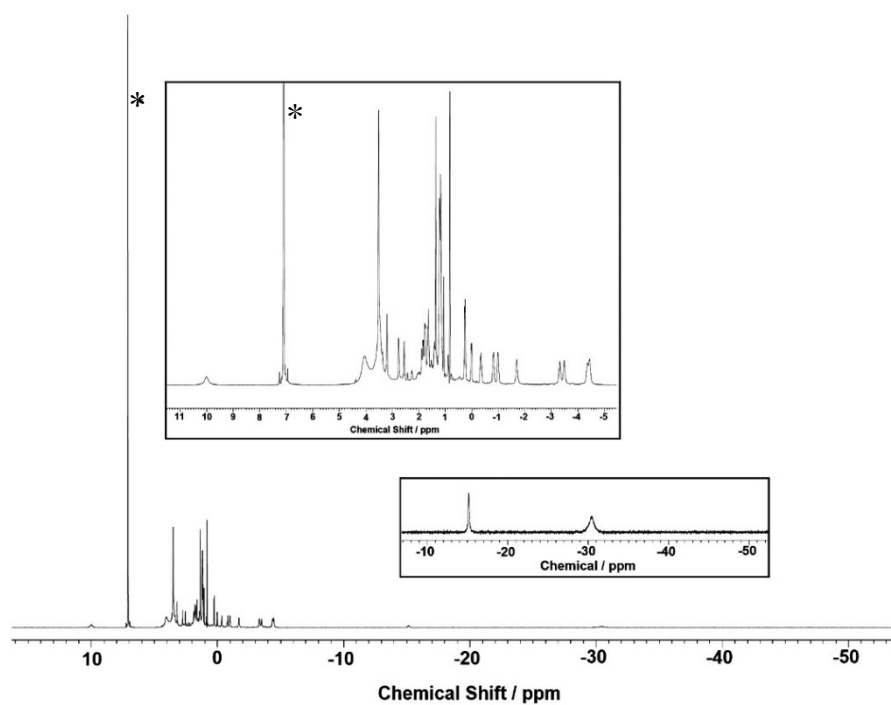

**Figure S13.**  $^1\text{H}$  NMR spectrum of  $[\text{VK}(\text{L}^{\text{Cy}2})(\mu\text{-N}_2)(18\text{-crown-6})]$  (**4**) in  $\text{C}_6\text{D}_6$  at 298 K (500 MHz,  $\delta/\text{ppm}$  vs  $\text{C}_6\text{D}_6$  (7.16 ppm)). The peak with an asterisk shows solvent. Inset: Expanded views of a range of  $-5 - 11$  ppm (top) and  $-50 - -10$  ppm (bottom).

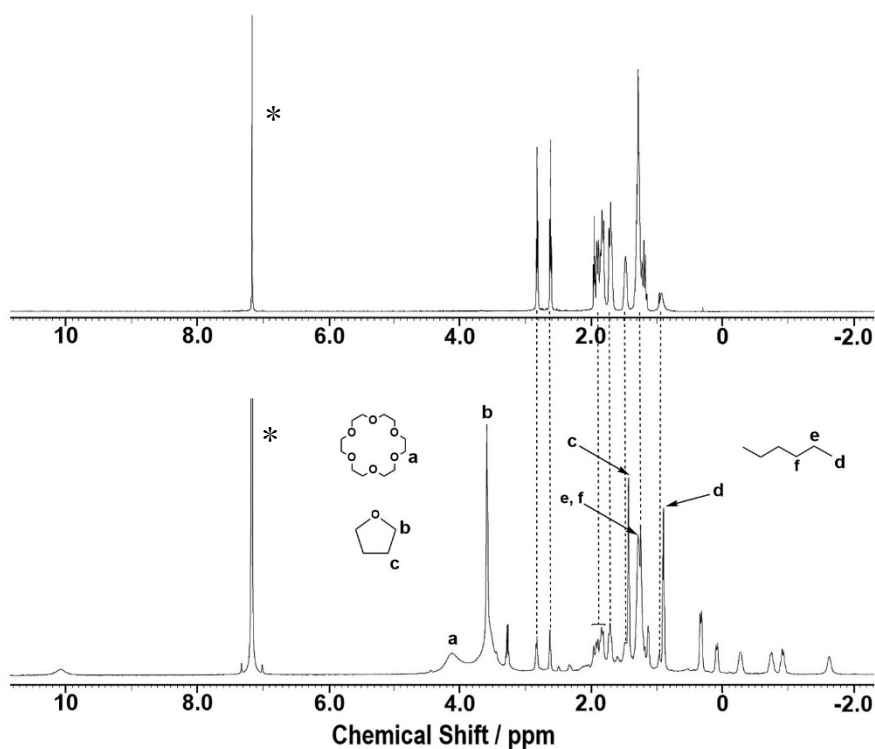

**Figure S14.**  $^1\text{H}$  NMR spectra of  $\text{H}_3\text{L}^{\text{Cy}2}$  (top) and  $[\text{VK}(\text{L}^{\text{Cy}2})(\mu\text{-N}_2)(18\text{-crown-6})]$  (**4**) (bottom) in the range of  $-2 - 10$  ppm in  $\text{C}_6\text{D}_6$  at 298 K (500 MHz,  $\delta/\text{ppm}$  vs  $\text{C}_6\text{D}_6$  (7.16 ppm)). The peaks with an asterisk show solvent.

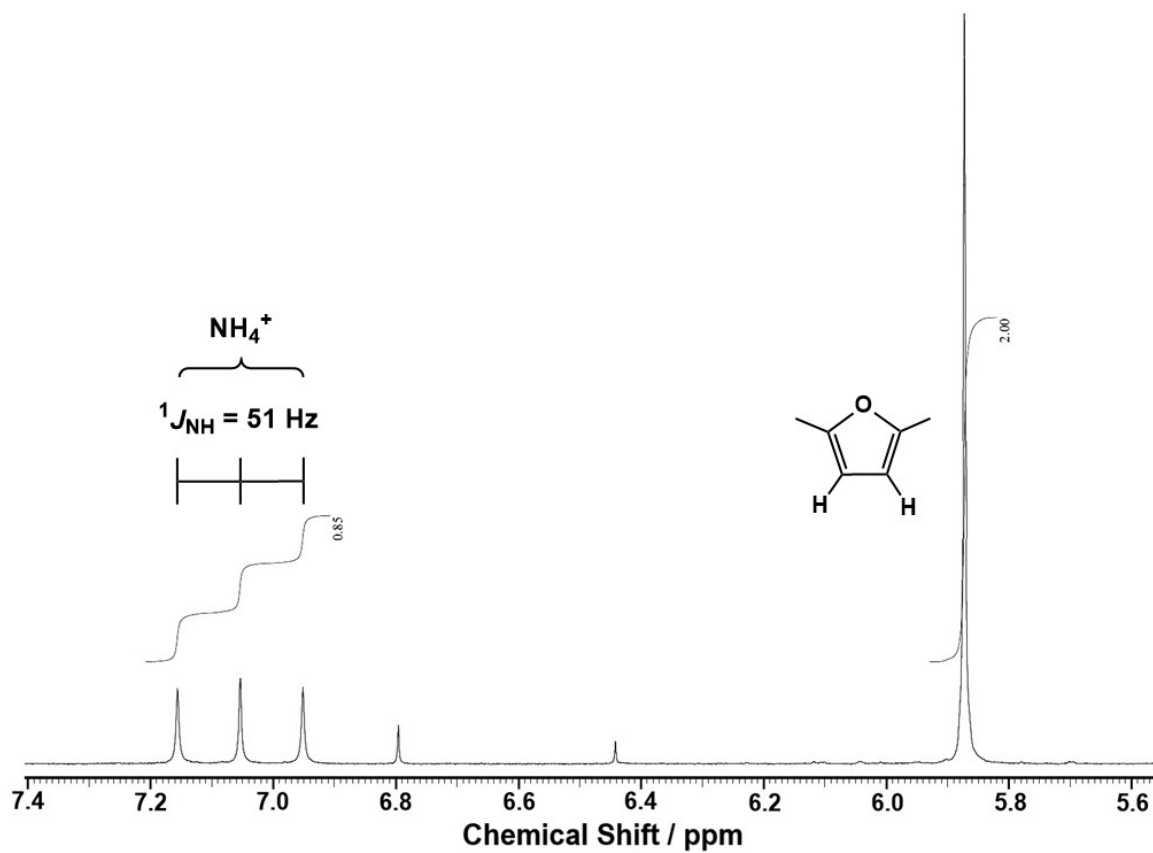

**Figure S15.**  $^1\text{H}$  NMR spectrum of  $^{14}\text{NH}_4^+$  that was obtained from the reaction of **1** with 80 equiv.  $\text{K}[\text{C}_{10}\text{H}_8]$  and 80 equiv. HOTf under  $^{14}\text{N}_2$  ( $\text{DMSO-}d_6$ , 500 MHz). Chemical shifts are shown versus  $\text{DMSO-}d_6$  (2.50 ppm).

**Table S2.** Yields of NH<sub>3</sub> and N<sub>2</sub>H<sub>4</sub> Produced by the Protonation of Dinitrogen Ligands for **1**, **2**, **3**, and **4**.

| complex <sup>[b]</sup> | reductant                                                      | proton source | product                                     |                          |         |                                              |                                                 |         |
|------------------------|----------------------------------------------------------------|---------------|---------------------------------------------|--------------------------|---------|----------------------------------------------|-------------------------------------------------|---------|
|                        |                                                                |               | NH <sub>4</sub> <sup>+</sup> <sup>[c]</sup> |                          |         | N <sub>2</sub> H <sub>4</sub> <sup>[f]</sup> |                                                 |         |
|                        |                                                                |               | Integration <sup>[d]</sup>                  | yield / % <sup>[e]</sup> | average | Absorbance <sup>[g]</sup>                    | yield / % <sup>[h]</sup><br>(calibration curve) | average |
| <b>1</b>               | Na <sup>+</sup> [C <sub>10</sub> H <sub>8</sub> ] <sup>-</sup> | HOTf          | 0.085                                       | 7.4                      |         | 0.084                                        | 0.35 (1)                                        |         |
|                        |                                                                |               | 0.082                                       | 7.1                      | 7.7     | 0.084                                        | 0.35 (1)                                        | 0.36    |
|                        |                                                                |               | 0.10                                        | 8.7                      |         | 0.096                                        | 0.40 (1)                                        |         |
|                        | K <sup>+</sup> [C <sub>10</sub> H <sub>8</sub> ] <sup>-</sup>  | HOTf          | 0.53                                        | 46.1                     |         | 3.2                                          | 10.5 (2)                                        |         |
|                        |                                                                |               | 0.50                                        | 43.5                     | 47.3    | 3.3                                          | 11.1 (2)                                        | 10.9    |
|                        |                                                                |               | 0.82                                        | 52.2                     |         | 3.4                                          | 11.2 (2)                                        |         |
| <b>2</b>               | Na <sup>+</sup> [C <sub>10</sub> H <sub>8</sub> ] <sup>-</sup> | HOTf          | 0.069                                       | 7.6                      |         | 0.23                                         | 9.8 (1)                                         |         |
|                        |                                                                |               | 0.040                                       | 4.4                      | 5.4     | 0.25                                         | 10.7 (1)                                        | 10.6    |
|                        |                                                                |               | 0.038                                       | 4.2                      |         | 0.26                                         | 11.2 (1)                                        |         |
|                        | K <sup>+</sup> [C <sub>10</sub> H <sub>8</sub> ] <sup>-</sup>  | HOTf          | 0.36                                        | 39.6                     |         | 3.7                                          | 15.4 (2)                                        |         |
|                        |                                                                |               | 0.51                                        | 44.0                     | 37.8    | 3.7                                          | 15.6 (2)                                        | 15.9    |
|                        |                                                                |               | 0.27                                        | 29.7                     |         | 3.9                                          | 16.7 (2)                                        |         |
| <b>3</b>               | Na <sup>+</sup> [C <sub>10</sub> H <sub>8</sub> ] <sup>-</sup> | HOTf          | 0.026                                       | 4.9                      |         | -0.0034                                      | - 0.0003 (1)                                    |         |
|                        |                                                                |               | 0.026                                       | 5.0                      | 6.5     | -0.00099                                     | - 0.0001 (1)                                    | n.d.    |
|                        |                                                                |               | 0.051                                       | 9.6                      |         | -0.00054                                     | 0.0000 (1)                                      |         |
|                        | K <sup>+</sup> [C <sub>10</sub> H <sub>8</sub> ] <sup>-</sup>  | HOTf          | 0.79                                        | 74.9                     |         | 0.85                                         | 6.22 (2)                                        |         |
|                        |                                                                |               | 0.81                                        | 76.8                     | 77.4    | 0.94                                         | 6.83 (2)                                        | 6.7     |
|                        |                                                                |               | 0.85                                        | 80.6                     |         | 0.95                                         | 6.92 (2)                                        |         |
| <b>4</b>               | K <sup>+</sup> [C <sub>10</sub> H <sub>8</sub> ] <sup>-</sup>  | HOTf          | 0.95                                        | 75.4                     |         | 0.65                                         | 5.0 (3)                                         |         |
|                        |                                                                |               | 1.1                                         | 84.7                     | 80.1    | 0.68                                         | 5.2 (3)                                         | 5.0     |
|                        |                                                                |               | 1.0                                         | 80.1                     |         | 0.61                                         | 4.7 (3)                                         |         |

[a] All reactions were carried out in THF under N<sub>2</sub> at -78 °C. [b] [complex] = 6.7 × 10<sup>-3</sup> M. [c] Quantification of NH<sub>4</sub><sup>+</sup> was calculated by <sup>1</sup>H NMR method. [d] [2,5-dimethyltetrahydrofuran (std)] = 5.2 × 10<sup>-2</sup> M. The integration values of NH<sub>4</sub><sup>+</sup> are shown against the vinyl protons of 2,5-dimethylfuran (2H). [e] Yields are based on a chromium ion. [f] Quantifications of N<sub>2</sub>H<sub>4</sub> were calculated by *p*-dimethylaminobenzaldehyde method. [g] This value was obtained from absorbance of the peak at 458 nm of a yellow azine dye. [h] Yields are based on a vanadium ion.

(1)

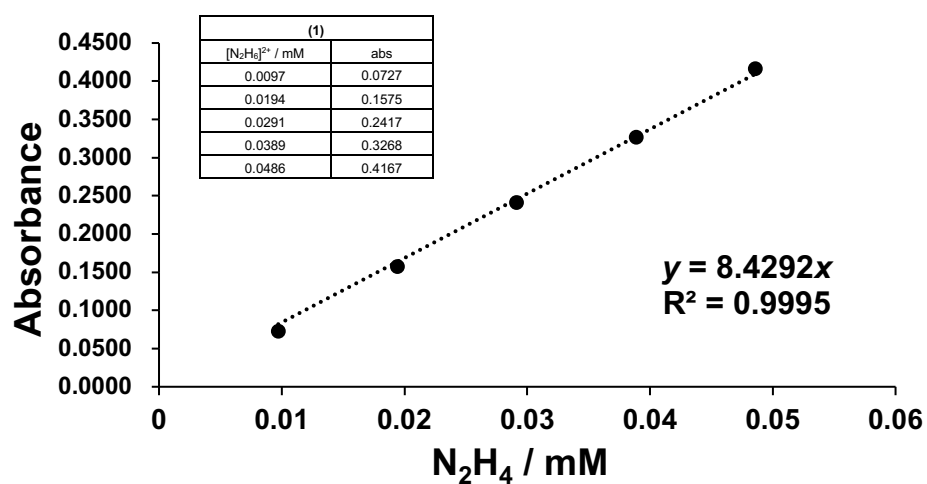

(2)

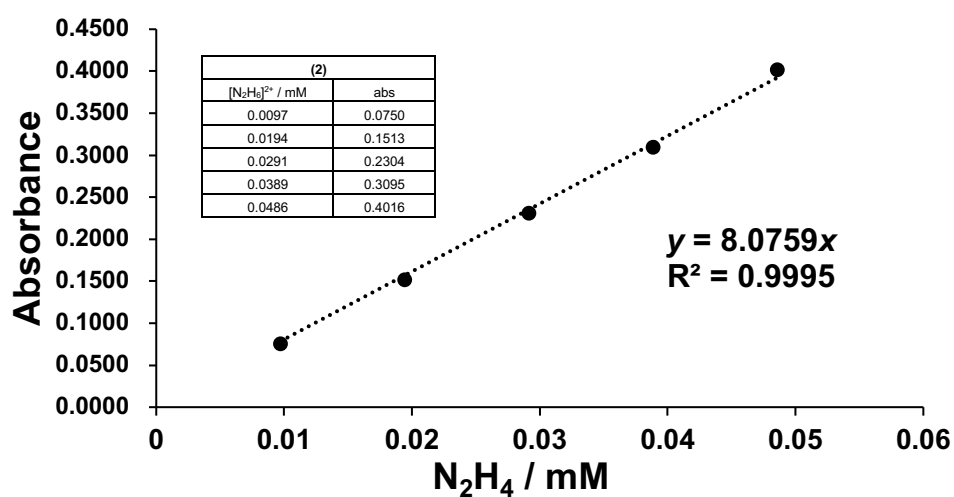

(3)

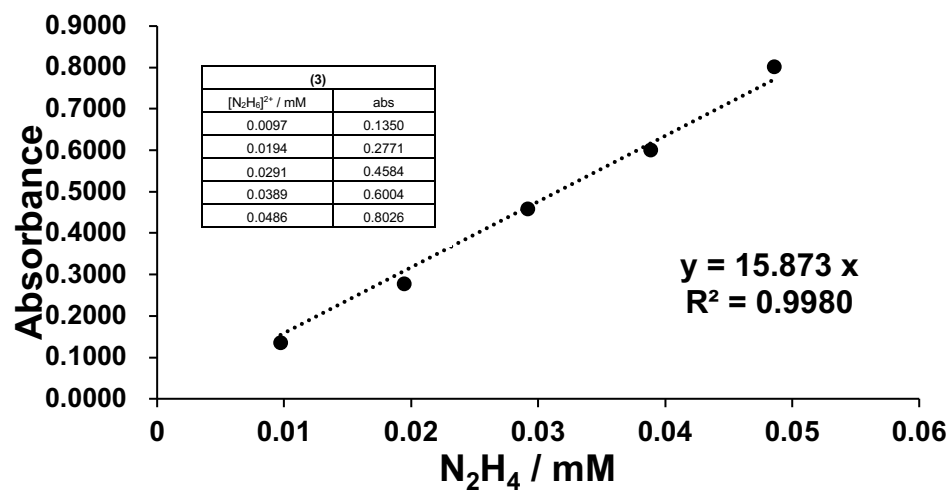

Figure S16. Calibration curves for hydrazine quantification.
